# Supplementary material for: Electrochemical Mg2+ intercalation into a bimetallic CuFe Prussian blue analog in aqueous electrolytes
Source: Royal Society of Chemistry journal article supplement (doi:10.1039/c3ta13205f), 2013-01-01
Supplement: c3ta13205f.pdf [file c3ta13205f.pdf]

*Supporting information*

Electrochemical  $\text{Mg}^{2+}$  intercalation into a bimetallic CuFe Prussian blue  
analog with aqueous electrolytes

Yoshifumi Mizuno,<sup>1,2</sup> Masashi Okubo,<sup>1,\*</sup> Eiji Hosono,<sup>1</sup> Tetsuichi Kudo,<sup>1</sup> Katsuyoshi  
Oh-ishi,<sup>2</sup> Atsushi Okazawa,<sup>3</sup> Norimichi Kojima,<sup>3</sup> Ryosuke Kurono,<sup>4</sup> Shin-ichi  
Nishimura,<sup>4</sup> Atsuo Yamada<sup>4</sup>

<sup>1</sup>National Institute of Advanced Industrial Science and Technology, Umezono 1-1-1,  
Tsukuba, Ibaraki 305-8568, Japan

<sup>2</sup>Department of Applied Chemistry, Chuo University, Kasuga 1-13-27, Bukyo-ku, Tokyo  
112-8551, Japan

<sup>3</sup>Graduate School of Arts and Sciences, The University of Tokyo, Komaba 3-8-1,  
Meguro-ku, Tokyo 153-8902, Japan

<sup>4</sup>Department of Chemical System Engineering, School of Engineering, The University  
of Tokyo, Hongo 7-3-1, Bunkyo-ku, Tokyo, 113-8656, Japan

To whom correspondence should be addressed: m-okubo@aist.go.jp

## *Experimental*

CuFe-PBA was prepared by a precipitation method. An aqueous solution of 0.15 M  $\text{CuSO}_4 \cdot 5\text{H}_2\text{O}$  was added dropwise to an aqueous solution of 0.1 M  $\text{K}_3\text{Fe}(\text{CN})_6$ . The precipitate was centrifuged, washed with distilled water, and then dried in vacuo for 24h.

The composition was determined by the standard micro-analytical method for C, H and N elements and the coupled plasma mass spectroscopy for K, Fe and Ni elements. Calcd. for  $\text{K}_{0.1}\text{Cu}[\text{Fe}(\text{CN})_6]_{0.7} \cdot 3.6\text{H}_2\text{O}$ : K, 1.39; Cu, 22.6; Fe, 13.9; C, 17.97; N, 20.96 and H, 2.59. Found: K, 1.48; Cu, 21.9; Fe, 13.4; C, 18.20; N, 19.86 and H, 2.62.

Powder X-ray diffraction (XRD) measurement was carried out on a Bruker D8 Advance using Cu  $\text{K}\alpha$  radiation in steps of  $0.01^\circ$  over the  $2\theta$  range of  $5 - 80^\circ$ . The unit cell parameters were calculated by the least square fitting with peak top values. SEM measurement was carried out on a Carl Zeiss Supra 35.

For the electrochemical measurements, three electrode glass cells were used. CuFe-PBA was mixed homogeneously with 20 wt% acetylene black and 10 wt% polyvinylidene fluoride (PVdF) in N-methyl-2-pyrrolidone (NMP) by using a sono-horn. The resulting slurry was cast on a carbon paper and dried in vacuo for 12h. For a reference electrode, an Ag/AgCl in 3 M NaCl was used. For an electrolyte, an aqueous solution of 1 M  $\text{Mg}(\text{NO}_3)_2$  was used. For a counter electrode, the pretreated CuFe-PBA electrode was used as a reversible  $\text{Mg}^{2+}$  sink. For  $\text{Mg}^{2+}$  (de)intercalation, we used a galvanostat (SD-8, Hokuto Denko), and the cut-off voltages were 0.1 V and 1.0 V (vs. Ag/AgCl). The open-circuit voltages (OCVs) were measured by repeats of flowing

galvanostatic current (current density; 18 mA/g) for 10 minutes and the potential relaxation for 30 minutes under an open-circuit state.

For  $^{57}\text{Fe}$  Mössbauer spectroscopy,  $^{57}\text{Co}$  in Rh was used as a Mössbauer source. The spectra were measured in the transmission mode at room temperature. The spectra were calibrated by using six lines of  $\alpha\text{-Fe}$ , the center of which was taken as zero isomer shifts.

The X-ray absorption spectroscopy was performed using synchrotron radiation on beamline BL-7C of the Photon Factory. The synchrotron X-ray absorption spectroscopy was conducted under the approval of the Photon Factory Program Advisory Committee (Proposal 2012G110). The quantitatively  $\text{Mg}^{2+}$  intercalated/deintercalated samples were prepared by GITT, washed with water, and then dried in vacuo. The spectra were recorded in the transmission mode at room temperature under an ambient atmosphere. The X-ray energy for each edge was calibrated by using a corresponding metal foil. The obtained experimental data were analyzed using Rigaku REX2000 software.

Table S1. The fitting parameters for the Mössbauer spectra for  $\text{Mg}_x(\text{CuFe-PBA})$ .

| sample                             | state               | <i>IS</i><br>(mm/s) | <i>QS</i><br>(mm/s) | Line width<br>(mm/s) | Fraction(%) |
|------------------------------------|---------------------|---------------------|---------------------|----------------------|-------------|
| CuFe-PBA                           | LS $\text{Fe}^{3+}$ | -0.157(1)           | 0.506(2)            | 0.339(3)             | 100         |
| $\text{Mg}_{0.3}(\text{CuFe-PBA})$ | LS $\text{Fe}^{2+}$ | -0.058(6)           | 0                   | 0.67(4)              | 69          |
|                                    | LS $\text{Fe}^{3+}$ | -0.167(9)           | 0.97(2)             | 0.38(3)              | 31          |
| $\text{Mg}_0(\text{CuFe-PBA})$     | LS $\text{Fe}^{3+}$ | -0.180(3)           | 0.941(5)            | 0.467(6)             | 100         |
